# Supplementary material for: Identification of the Karyopherin Superfamily in Maize and Its Functional Cues in Plant Development
Source: MDPI journal article supplement (doi:10.3390/ijms232214103), 2022-11-15
Supplement: s1 [file s1]

**Table S1.** The Karyopherin Superfamily in *Arabidopsis thaliana*.

|                   | Subfamily      | Name (Aliases)   | Gene ID   | Function                                                                                                                                                   |
|-------------------|----------------|------------------|-----------|------------------------------------------------------------------------------------------------------------------------------------------------------------|
| Importin $\alpha$ | $\alpha 1$     | IMPA1            | AT3G06720 | Flowering regulation [76]                                                                                                                                  |
|                   |                | IMPA2            | AT4G16143 | Flowering regulation [76]; Plant immunity [167]                                                                                                            |
|                   |                | IMPA3 (MOS6)     | AT4G02150 | Flowering regulation [76]; Cytokinin-activated cell division [121]; Plant immunity [168]                                                                   |
|                   |                | IMPA4            | AT1G09270 | Stem cell differentiation [77]; Virulence protein nuclear import [169]                                                                                     |
|                   |                | IMPA5            | AT5G49310 | Unknown                                                                                                                                                    |
|                   |                | IMPA6            | AT1G02690 | Root development [78]; Cytokinin-activated cell division [121]                                                                                             |
|                   |                | IMPA7            | AT3G05720 | Unknown                                                                                                                                                    |
|                   |                | IMPA8            | AT5G52000 | Unknown                                                                                                                                                    |
|                   | PLANT $\alpha$ | IMPA9            | AT5G03070 | Root development [78]                                                                                                                                      |
| Importin $\beta$  | IMB1           | ATKPNB1          | AT5G53480 | ABA-mediated drought response [41, 123]                                                                                                                    |
|                   | IMB2           | ATTRN1           | AT2G16950 | miRNA activity regulation [89]; Circadian clock regulation [83]                                                                                            |
|                   | IMB3           | KETCH1 (EMB2734) | AT5G19820 | miRNA biogenesis [88]; Gametogenesis [170]                                                                                                                 |
|                   | IMB4           | IMB4             | AT4G27640 | Root/ Ovule development [120, 171]; Cell wall assembly [82]                                                                                                |
|                   | IMB5           | IMB5             | AT1G26170 | Unknown                                                                                                                                                    |
|                   | IPO8           | AT3G59020        | AT3G59020 | Unknown                                                                                                                                                    |
|                   |                | SAD2 (GIR1)      | AT2G31660 | PCD process [92]; miRNA activity regulation [95]; ABA signal transduction [122]; UV-B response [172]; Trichome initiation [173]; Lignin modification [174] |
|                   | KA120          | KA120            | AT3G08960 | Plant immunity [92]                                                                                                                                        |
|                   | PLANTKAP       | PLANTKAP         | AT3G17340 | Unknown                                                                                                                                                    |
|                   | TNPO3          | MOS14            | AT5G62600 | Plant immunity [91]                                                                                                                                        |
|                   |                | TNPO3            | AT1G12930 | Unknown                                                                                                                                                    |
|                   | XPO1           | XPO1A (ATCRM1)   | AT5G17020 | Plant immunity [95]; ABA responses [124]; Chromatin regulation [139]; Heat response [175]; Gametophyte development [176]                                   |
|                   |                | XPO1B (CRM1B)    | AT3G03110 | Plant immunity [90]; Gametophyte development [176]                                                                                                         |
|                   | XPO2           | XPO2             | AT2G46520 | Unknown                                                                                                                                                    |
|                   | XPOT           | PAUSED (PSD)     | AT1G72560 | tRNA export [177, 178]                                                                                                                                     |
|                   | XPO4           | XPO4             | AT3G04490 | Plant immunity [179]                                                                                                                                       |
|                   | XPO5           | HASTY            | AT3G05040 | miRNA biogenesis [43,166]; Morphogenesis [103]                                                                                                             |
|                   | XPO7           | XPO7             | AT5G06120 | Unknown                                                                                                                                                    |

**Table S2.** Distribution of Karyopherin genes in the Maize1 and Maize2 subgenomes.

| Orthologous genes<br>in Sorghum | Maize1 subgenome |                | Maize2 subgenome |                | Gene<br>duplication | Dispersed genes in Maize |                |
|---------------------------------|------------------|----------------|------------------|----------------|---------------------|--------------------------|----------------|
|                                 | Name             | Gene ID        | Name             | Gene ID        |                     | Name                     | Gene ID        |
| Sobic.003G115100                | ZmIMP $\alpha$ 2 | Zm00001d040274 | ZmIMP $\alpha$ 1 | Zm00001d008345 | R                   | ZmIMP $\alpha$ 5         | Zm00001d040153 |
| Sobic.009G050700                | ZmIMP $\alpha$ 3 | Zm00001d037606 | ZmIMP $\alpha$ 4 | Zm00001d009850 | R                   | ZmXPO5                   | Zm00001d009270 |
| Sobic.009G102900                | ZmIMB1c          | Zm00001d038021 | ZmIMB1d          | Zm00001d010512 | R                   | ZmPLANTKAPb              | Zm00001d019335 |
| Sobic.006G280000                | ZmIMB2b          | Zm00001d026696 | ZmIMB2a          | Zm00001d002936 | R                   | ZmIPO8a                  | Zm00001d050526 |
| Sobic.001G004400                | ZmXPO1b          | Zm00001d034914 | ZmXPO1a          | Zm00001d012815 | R                   |                          |                |
| Sobic.001G115500                | ZmXPO2a          | Zm00001d033764 | ZmXPO2b          | Zm00001d013417 | R                   |                          |                |
| Sobic.002G372500                | ZmXPOTa          | Zm00001d022125 | ZmXPOTb          | Zm00001d006845 | R                   |                          |                |
| Sobic.001G219600                | ZmTNPO3c         | Zm00001d032699 | ZmTNPO3b         | Zm00001d014033 | R                   |                          |                |
| Sobic.002G423200                | ZmIMP $\alpha$ 6 | Zm00001d022536 |                  | /              | L                   |                          |                |
| Sobic.008G135300                | ZmIMB1a          | Zm00001d030694 |                  | /              | L                   |                          |                |
| Sobic.002G350600                | ZmIMB3a          | Zm00001d021893 |                  | /              | L                   |                          |                |
| Sobic.002G350600                | ZmIMB3b          | Zm00001d021893 |                  | /              | L                   |                          |                |
| Sobic.001G429600                | ZmIMB4           | Zm00001d028511 |                  | /              | L                   |                          |                |

|                  |             |                |         |            |   |
|------------------|-------------|----------------|---------|------------|---|
| Sobic.010G114900 | ZmIMB5      | Zm00001d045725 | /       |            | L |
| Sobic.004G145000 | ZmIPO8b     | Zm00001d016479 | /       |            | L |
| Sobic.005G222000 | ZmPLANTKAPa | Zm00001d048628 | /       |            | L |
| Sobic.005G142800 | ZmTNPO3a    | Zm00001d052632 | /       |            | L |
| Sobic.001G219900 | ZmXPO4      | Zm00001d032704 | /       |            | L |
| Sobic.003G063000 | /           |                | ZmIMPα6 | Zm00001d00 | L |
|                  |             |                |         | 8640       |   |
| Sobic.008G135200 | /           |                | ZmIMB1b | Zm00001d04 | L |
|                  |             |                |         | 1556       |   |
| Sobic.002G429300 | /           |                | ZmKA120 | Zm00001d00 | L |
|                  |             |                |         | 7225       |   |
| Sobic.010G072800 | /           |                | ZmXPO7  | Zm00001d03 | L |
|                  |             |                |         | 7100       |   |

R for retained homoeolog gene, L for lost homoeolog genes.

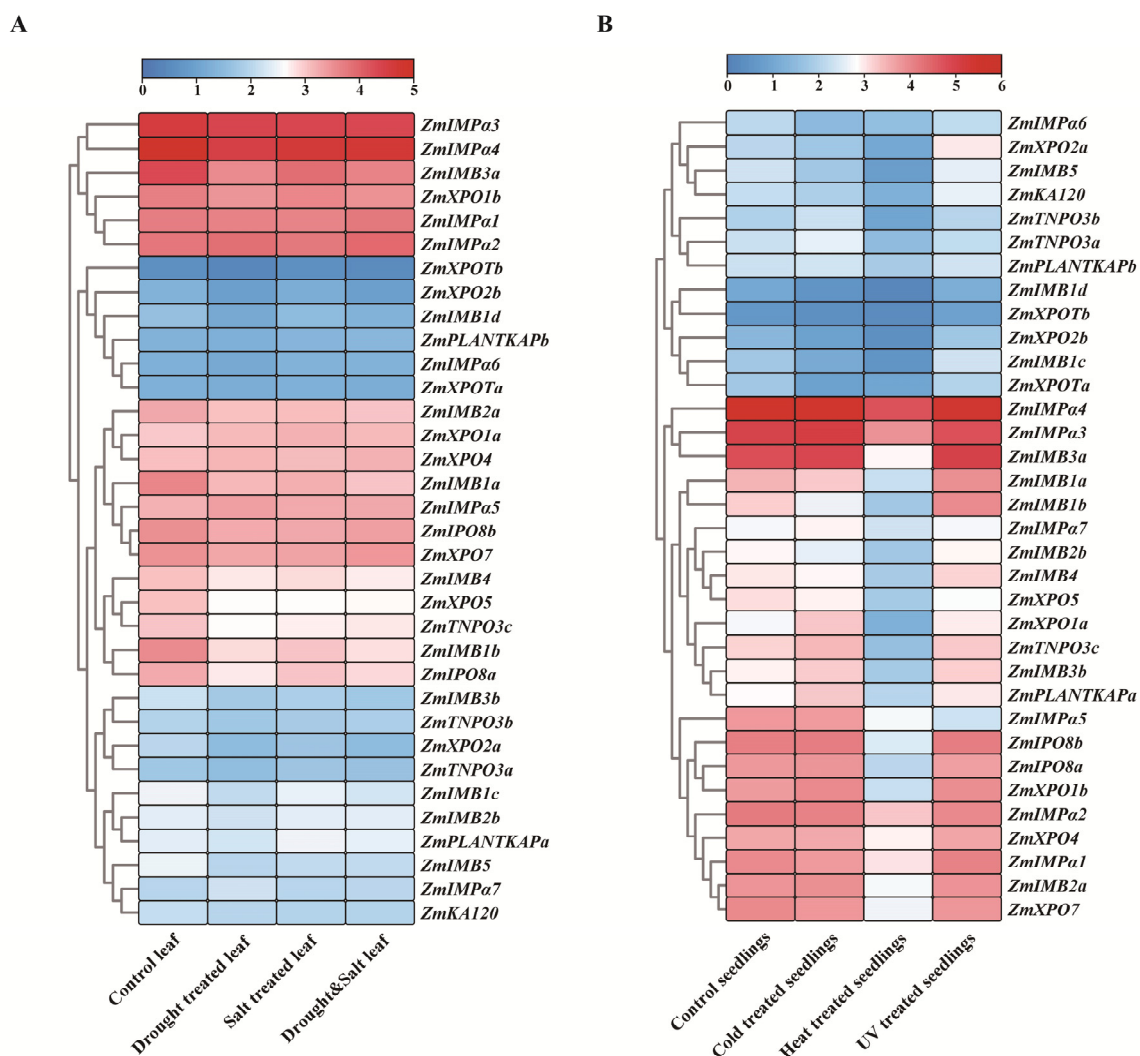

**Figure S1** Heat-map of the expression profile of *ZmKAP* genes under abiotic stress. (A) The expression profile of *ZmKAP* genes under drought, salt, and drought & salt treatment. (B) The expression profile of *ZmKAP* genes under cold, heat, and ultraviolet (UV) treatment. The data comes from qTeller MaizeGDB

(<https://qteller.maizgdb.org/>). The expression value is calculated by  $\log_2$  (TPM) and drawn by TBtools software.
